# Supplementary material for: Macrophages recycle phagocytosed bacteria to fuel immunometabolic responses
Source: Research Square preprint supplement (doi:10.21203/rs.3.rs-3887691/v1), 2024-01-30
Supplement: Supplementary file 1 [file 849ead2d0b69631859d70916.pdf]

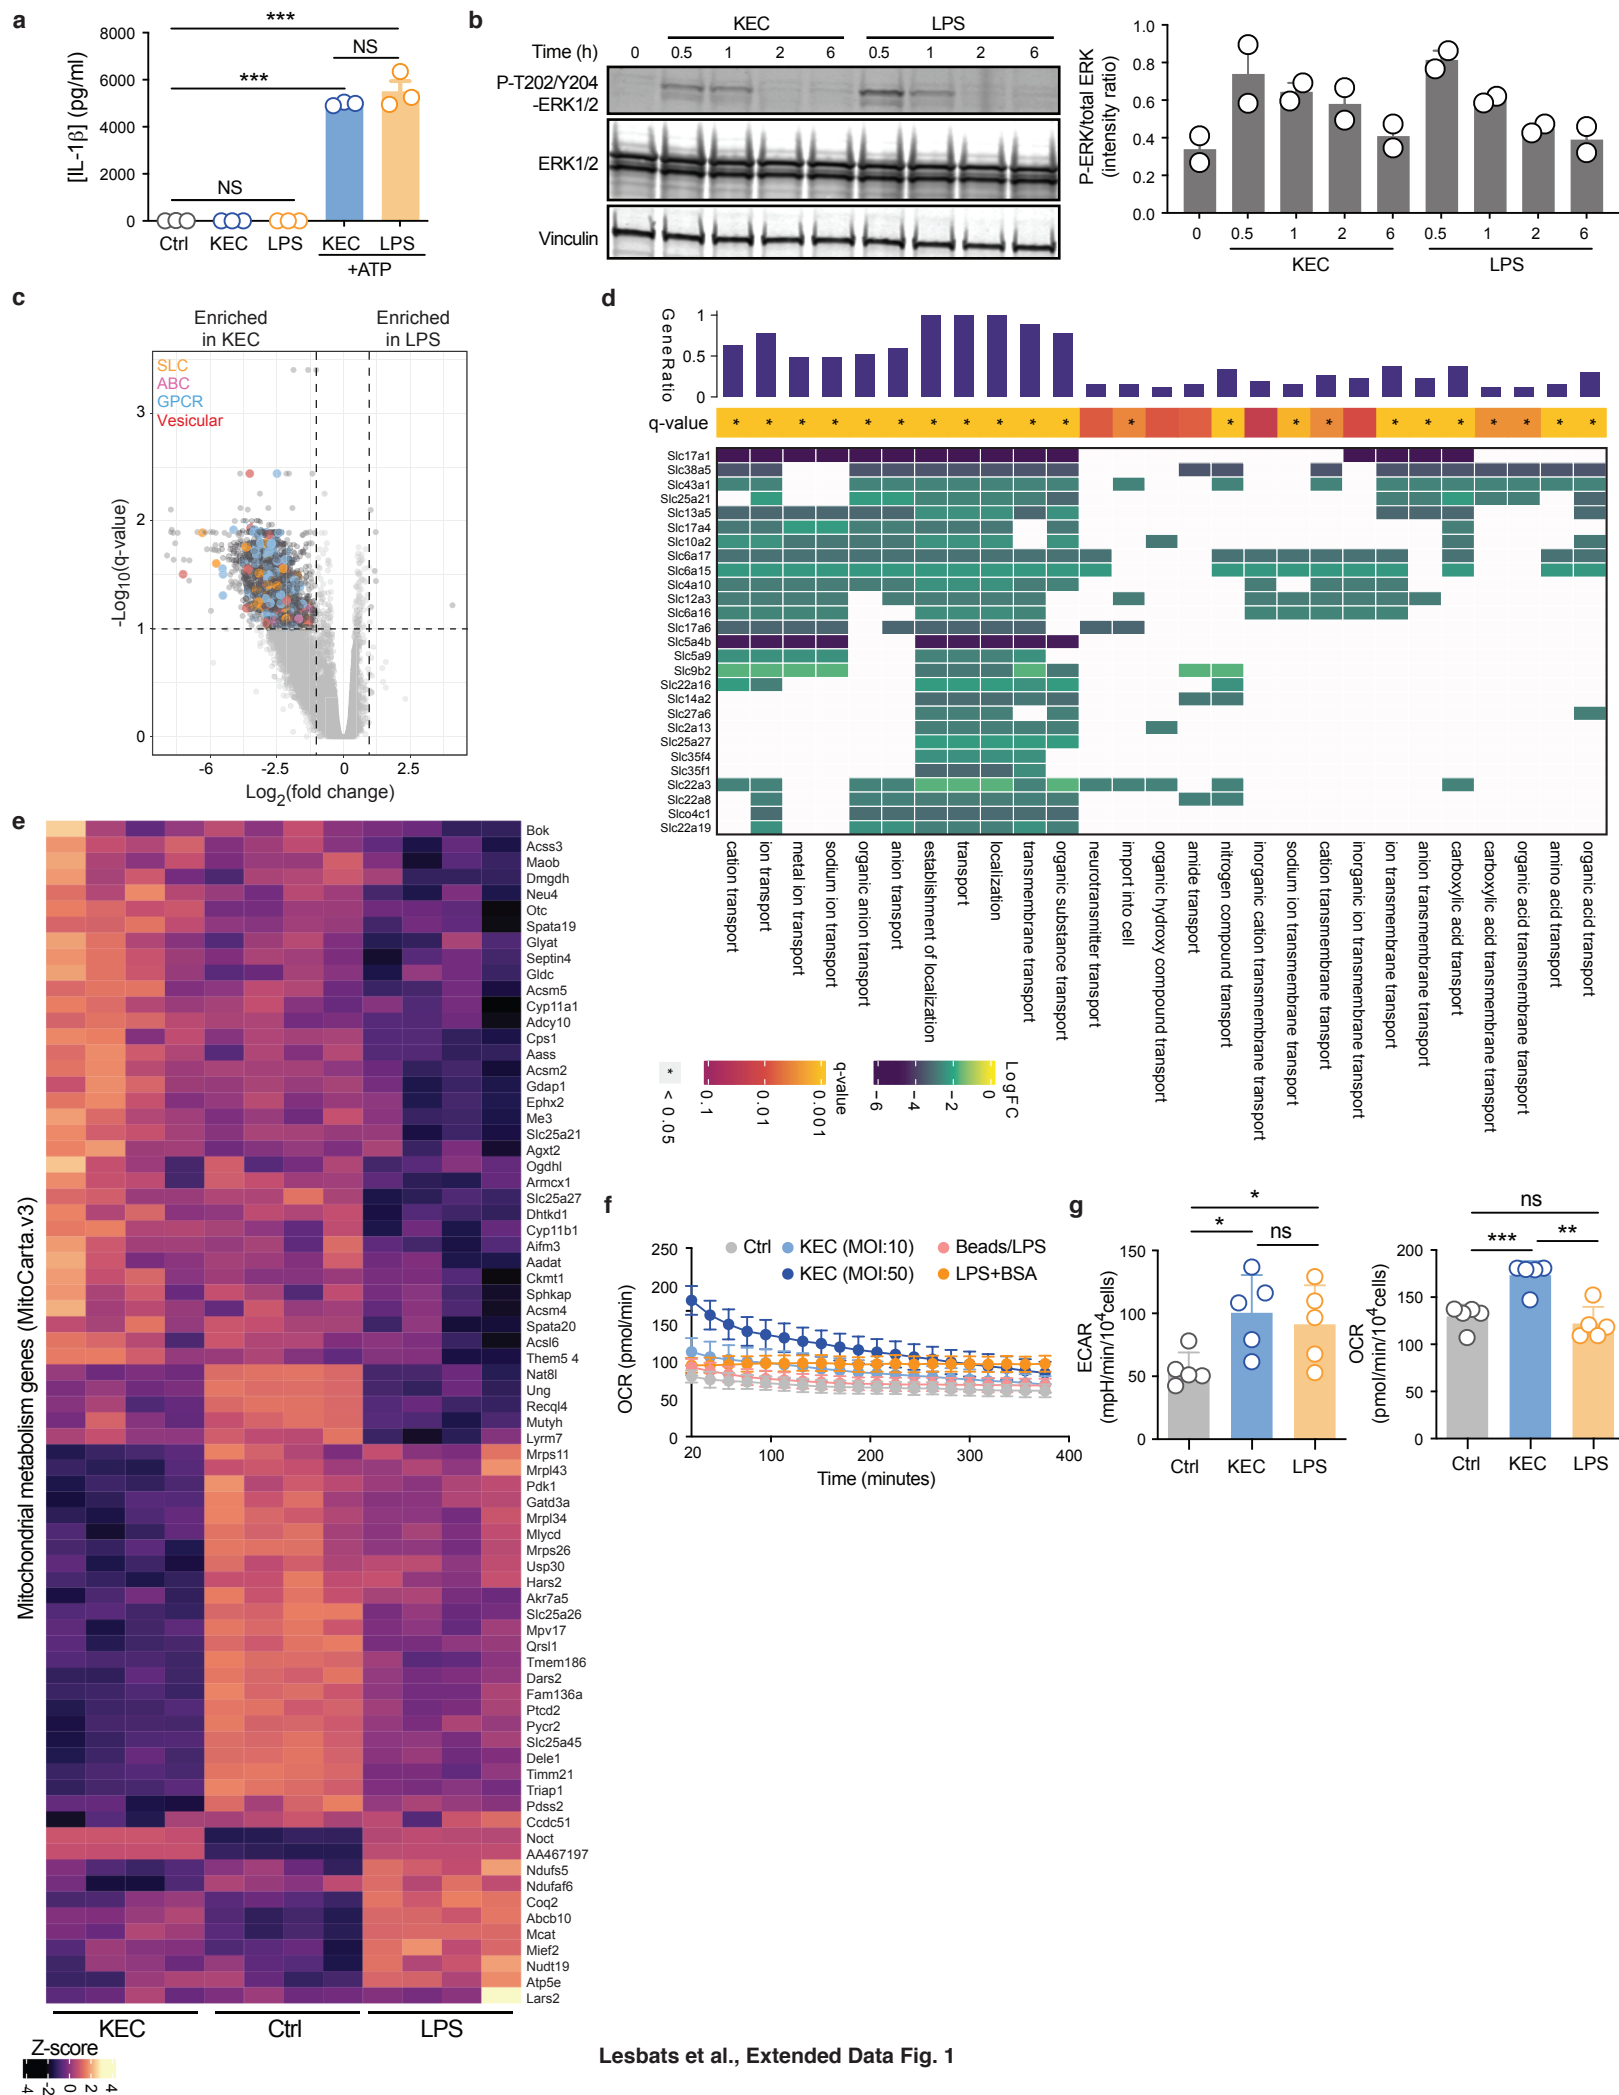

### Extended Data Fig. 1: Killed *E. coli* specifically reprograms mitochondria metabolism

**a**, Representative ELISA for IL-1 $\beta$  levels in conditioned medium of BMDMs stimulated with KEC or LPS for 4h and subsequently treated or not with ATP for 30min. \*\*\* $p < 0.001$ . N=3 technical replicates. Data are representative of at least 3 experiments. **b**, Heat map showing the top differentially expressed solute carrier (Slc) genes in BMDMs stimulated 4h with KEC upon treatment with concanamycin A or vehicle (DMSO). **c**, Representative immunoblots of BMDMs stimulated with LPS or KEC for the indicated time. Vinculin is used as a loading control. **d**, Heat maps showing the top differentially expressed solute carrier (Slc) genes and their functions in BMDMs stimulated 4h with KEC as compared to LPS. **e**, Heat maps showing the top differentially expressed mitochondria-associated genes in BMDMs left untreated (Ctrl) or stimulated 4h with KEC or LPS. **f**, oxygen consumption rate (OCR) on BMDMs treated with KEC, LPS covered-latex beads (Beads/LPS) or bovine serum albumin + LPS (LPS+BSA) in a minimal medium supplemented with glucose. Data are mean  $\pm$  SD, N= 6 technical replicates. Data are representative of at least 3 experiments. **g**, Extracellular acidification rate (ECAR, left) and oxygen consumption rate (OCR, right) on BMDMs treated for 30min with KEC or LPS in a minimal medium supplemented with glucose. Data are mean  $\pm$  s.e.m., N=5 biological replicates (with 6 technical replicates). \* $p < 0.05$ , \*\*\* $p < 0.001$ ; ns, not significant.

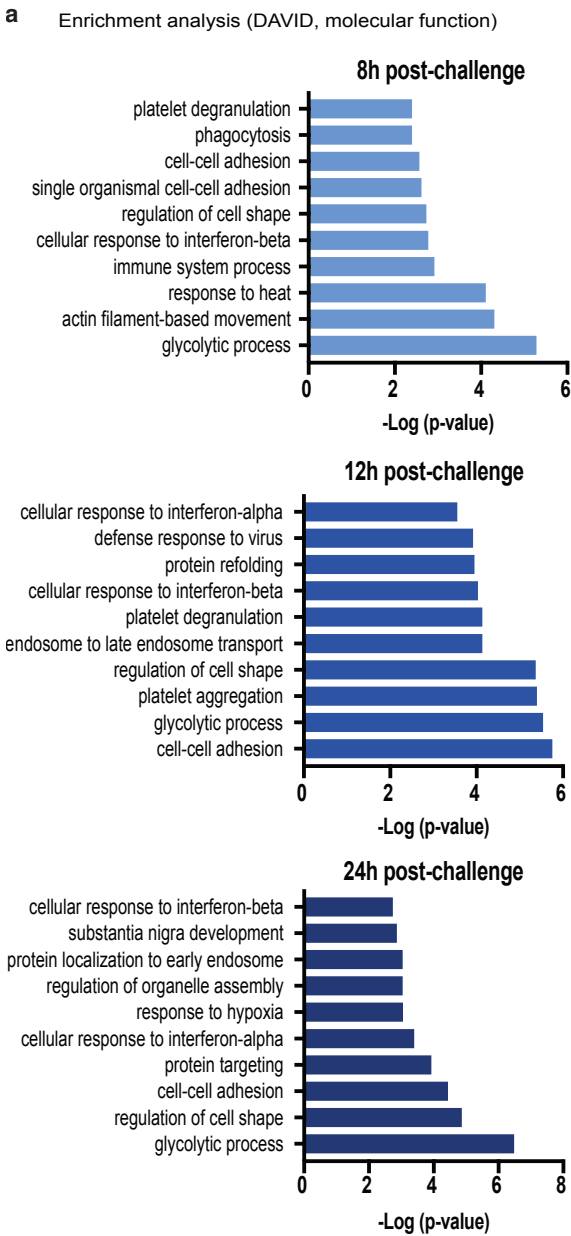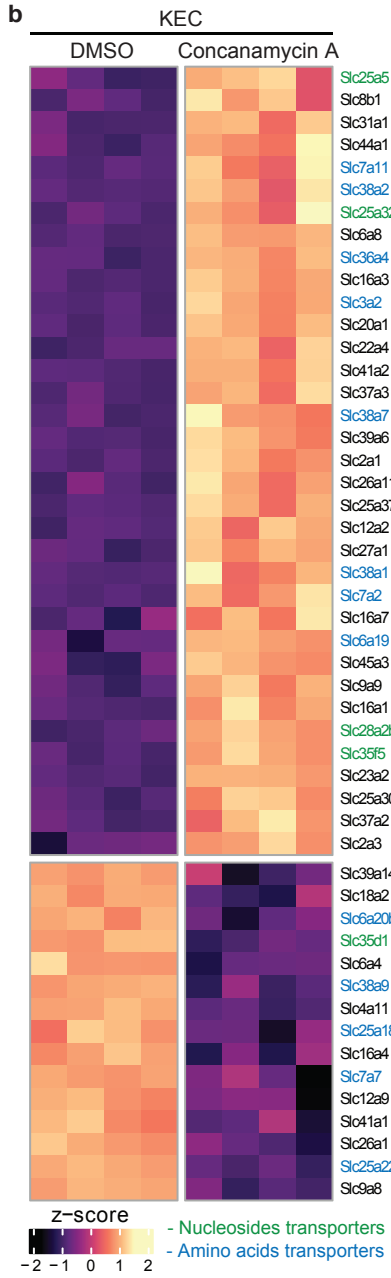

**Extended Data Fig. 2: Killed *E. coli* is a source of amino acids for macrophage upon phagocytosis**

**a**, Top pathways identified by DAVID functional enrichment analysis from heavy proteins identified by LC-MS of BMDMs that have phagocytosed SILAC-KEC for the indicated time points. **b**, Heat map showing the top differentially expressed solute carrier (Slc) genes in BMDMs stimulated 4h with KEC upon treatment with concanamycin A or vehicle (DMSO).

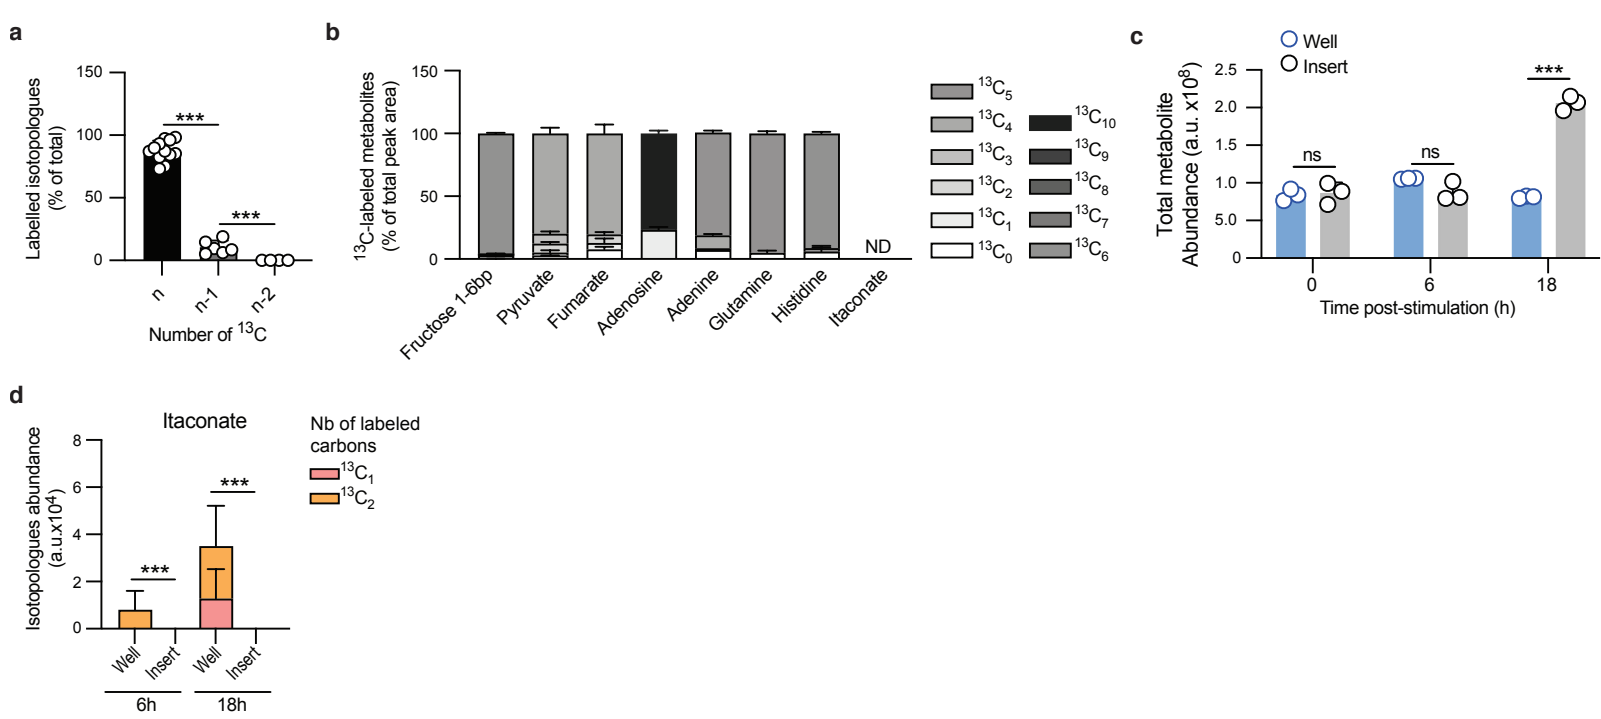

**Extended Data Fig. 3: Killed *E. coli* is a source of metabolites for macrophage upon phagocytosis**

**a**, Fractional labelling of metabolites in *E. coli* after a 3 day-culture in minimal M9 medium supplemented with U- $^{13}\text{C}$ glucose. Fraction of isotopologues was determined over 15 metabolites by UHPLC-MS. N=3 biological replicates. Data are expressed as percentage of total pool. \*\*\* $p < 0.001$ . N is the total number of carbons for an individual metabolite. **b**, Fractional labelling of the indicated metabolites in *E. coli* after 3 day-culture in minimal M9 medium supplemented with U- $^{13}\text{C}$ glucose as determined by UHPLC-MS. **c**, Total abundance of a pool of 45 metabolites in BMDMs cultured in direct contact (well) or separated (insert, trans-well) from fully-labelled U- $^{13}\text{C}$ Killed EC for 6h or 18h. N=3 biological replicates. Data are expressed as percentage of total pool. \*\*\* $p < 0.001$ ; ns, not significant. **d**, Fractional labelling of itaconate and glutathione (GSH) in BMDMs cultured in direct contact (well) or separated (insert, trans-well) from fully-labelled U- $^{13}\text{C}$ Killed EC for 6h or 18h. Fraction of isotopologues was determined by UHPLC-MS. N=3 biological replicates. \*\*\* $p < 0.001$ .

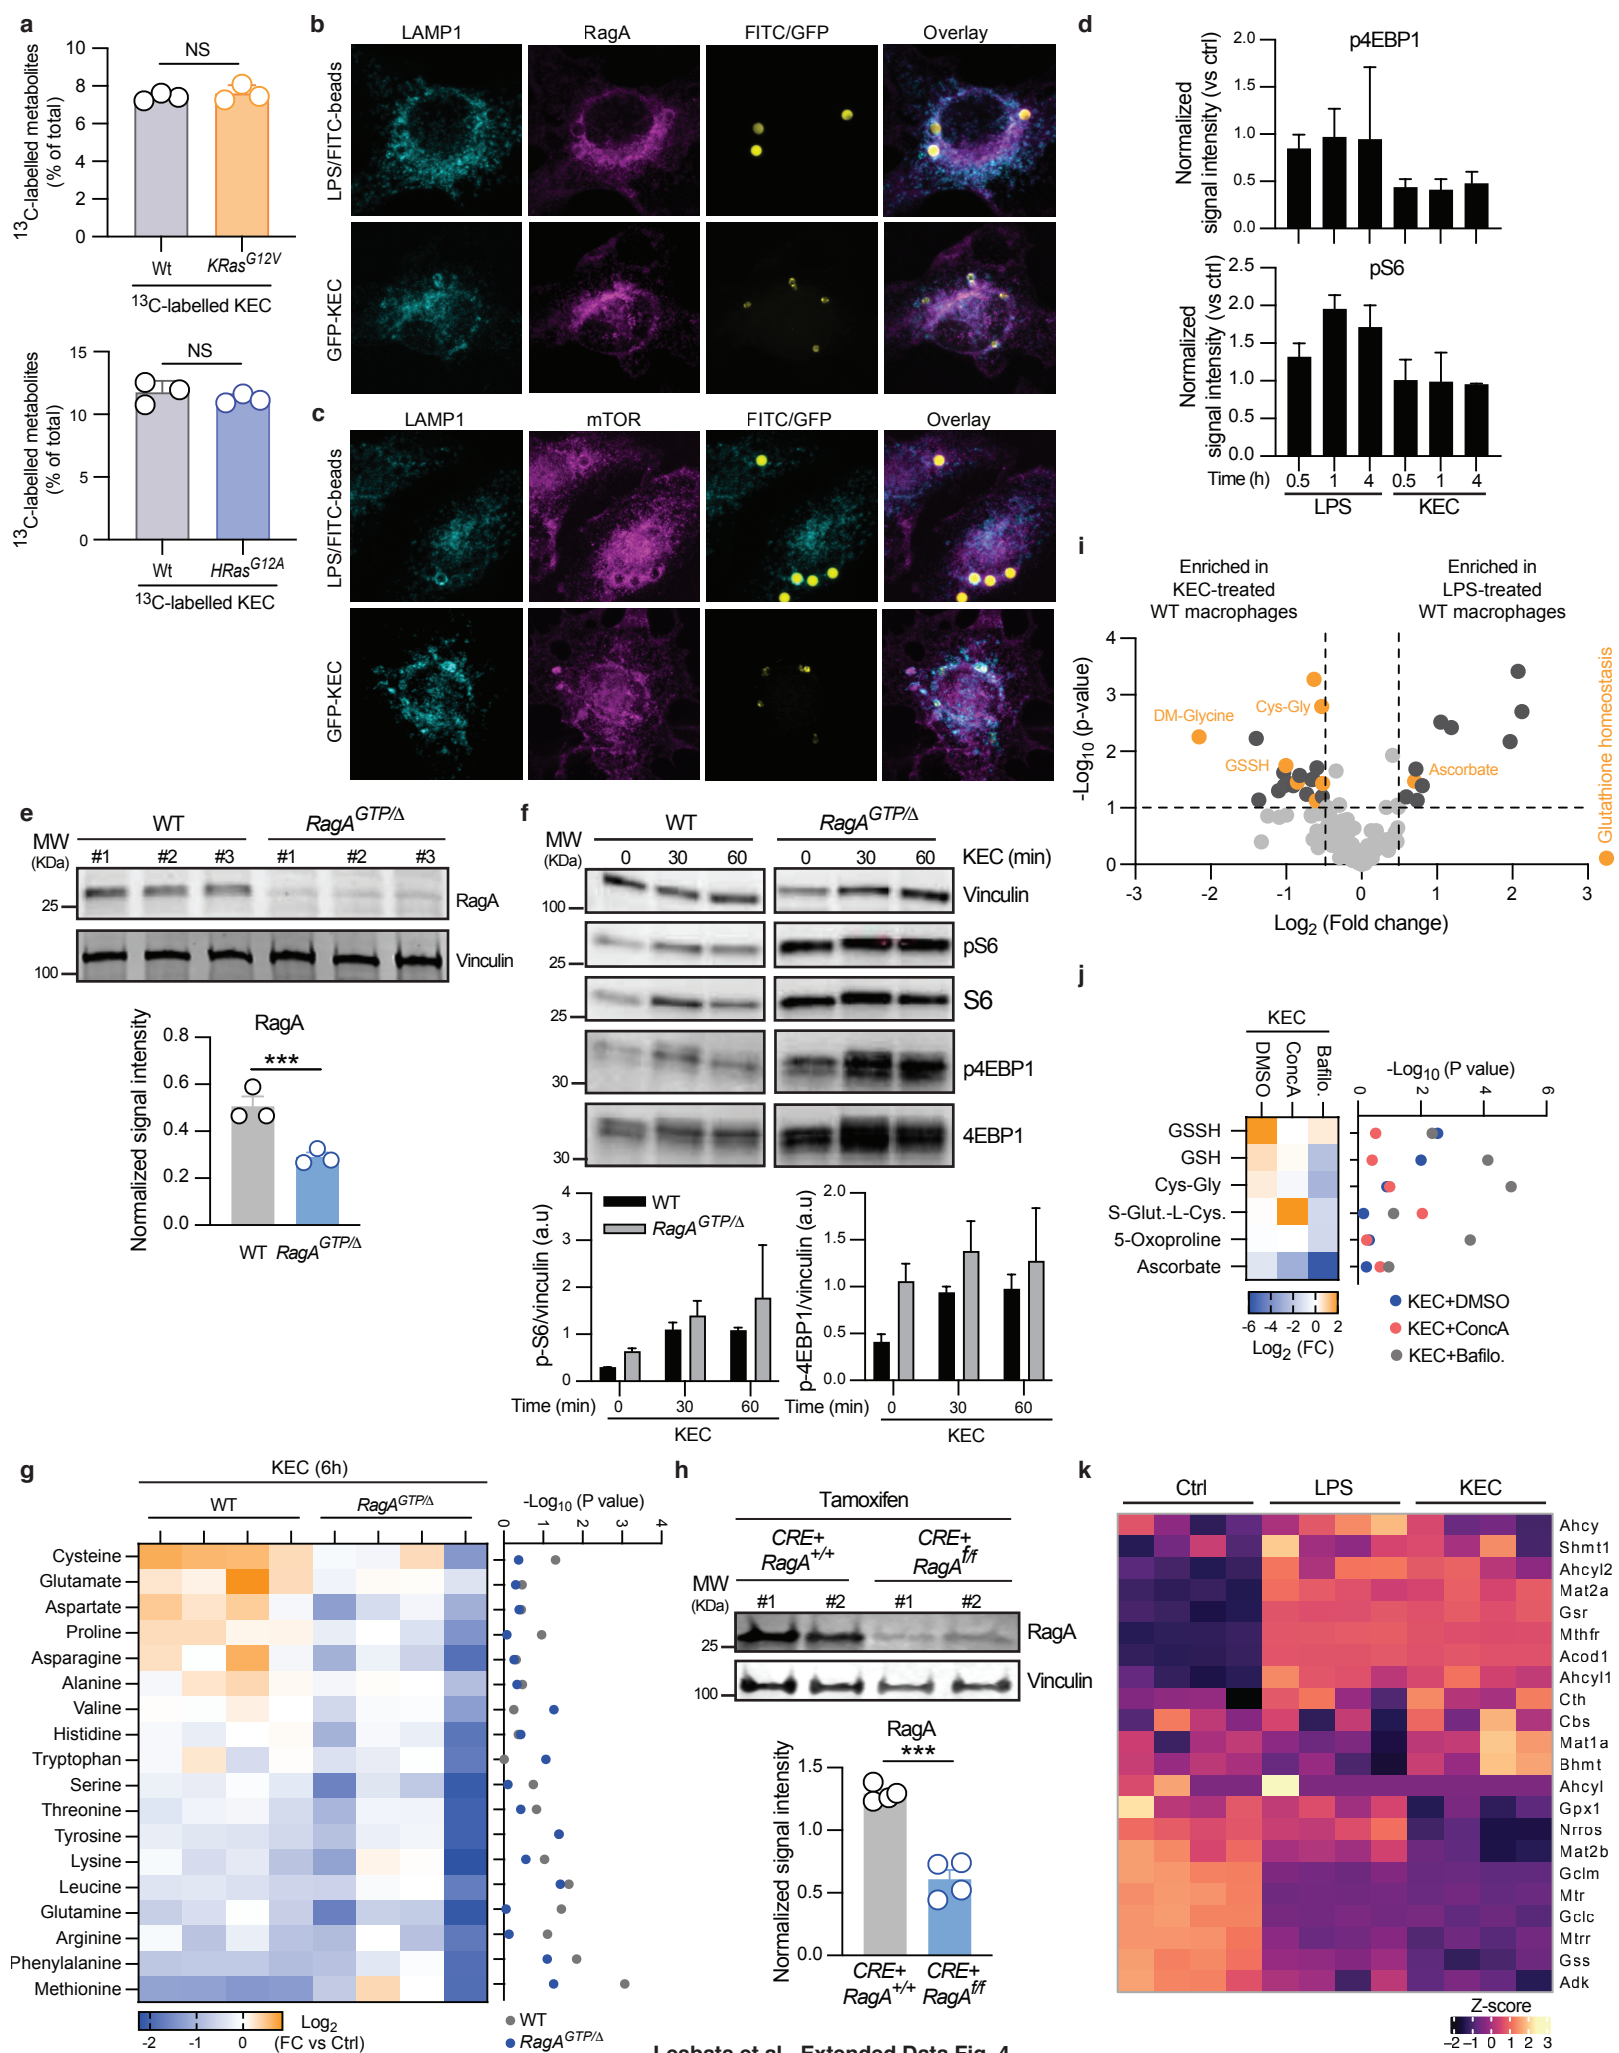

**Extended Data Fig. 4: RagA is required for KEC-mediated metabolic reprogramming of macrophages**

**a**, Fractional labelling of metabolites in *Kras*<sup>G12V</sup> (Upper panel) and *Hras*<sup>G12A</sup> (lower panel) BMDMs treated for 6h with fully-labelled U-[<sup>13</sup>C]KEC. Fraction of isotopologues was determined over 45 metabolites by LC-MS. N=3 biological replicates. Data are expressed as percentage of total pool. ns, not significant. **b,c**, Representative confocal microscopy images of BMDMs stained with anti-LAMP1 (lysosomes) and anti-RagA (**b**) or mTOR (**c**) antibodies, 20min after stimulation with LPS-covered FITC-latex beads or GFP-expressing KEC. **d**, Normalized signal intensity (normalized to control) of the indicated phosphor-specific 4EBP1 and S6 protein antibodies as determined by western blotting analysis BMDMs treated with LPS or KEC for different time points. Vinculin is used as a loading control. Data are representative of 3 experiments. **e**, Representative immunoblots of WT and *RagA*<sup>GTP/Δ</sup> BMDMs. Vinculin is used as a loading control. Three different BMDM preparations were used. Normalized signal ratio to vinculin is shown (lower panel). **f**, Representative immunoblots of WT and *RagA*<sup>GTP/Δ</sup> BMDMs stimulated with LPS or KEC for the indicated time. Normalized signal ratio to vinculin is shown (right panel). Vinculin is used as a loading control. **g**, Heat map of fold changes (log<sub>2</sub>) of amino acid abundances in WT and *RagA*<sup>GTP/Δ</sup> BMDMs stimulated with KEC relative to control (left). *P* values are for comparisons between amino acid abundances shown (right). N=4 biological replicates. **h**, Representative immunoblots of Cre<sup>+</sup>::*RagA*<sup>+/+</sup> and Cre<sup>+</sup>::*RagA*<sup>ff</sup> BMDMs treated with tamoxifen and stimulated with LPS or KEC for the indicated time. Normalized signal ratio to vinculin is shown (lower panel). Vinculin is used as a loading control. Four different BMDM preparations were used. **i**, Volcano plot of metabolite levels in BMDMs treated with LPS or KEC determined by LC-MS analysis. Dark grey plots show metabolites that are significantly increased (left) or decreased (right) in KEC-treated versus LPS-treated BMDMs; Log<sub>2</sub>FC>0.5 and Log<sub>10</sub>(*P*-value)>1. Orange dots show metabolites associated to GSH metabolism significantly modulated. N=7 biological replicates. **j**, Heat map of fold changes (log<sub>2</sub>) of abundances of metabolites of glutathione biosynthesis in WT BMDMs treated with bafilomycin A1 (Bafilo.) or concanamycin A (ConcA) stimulated with KEC relative to control (left). *P* values are for comparisons between amino acid abundances shown (right). N=4 biological replicates. **k**, Heat maps showing differential expression of genes associated with glutathione metabolism in BMDMs stimulated 4h with KEC or LPS. Ctrl, control un-stimulated BMDMs.





### Extended Data Fig. 5: Sensing of live and dead *E. coli* differentially modulates macrophage metabolism

**a**, Flow cytometry analysis of kinetic engulfment and degradation of GFP-expressing live *E. coli* (EC) or killed *E. coli* (KEC) by BMDMs (Right). Quantification of percentages (upper right) and mean fluorescence intensity (lower right) of GFP signal. N=3 per group. ns, not significant. **b**, GSH/GSSG ratio in BMDMs stimulated with live *E. coli* (EC) or killed EC (KEC) for 6h, determined by LC-MS. ns, not significant. **c,d**, Heat map showing differential expression of genes associated with GSH biosynthesis (**c**) and amino acid metabolism (**d**) between live EC- and KEC-treated BMDMs for 4h. N=4 biological replicates. **e**, Volcano plot of genes expression levels determined by bulk RNA sequencing. Dark grey plots show genes that are significantly increased (right) or decreased (left) in KEC-stimulated macrophages versus live EC-treated macrophages;  $\text{Log}_2\text{FC} > 1$  and  $\text{Log}_{10}(q\text{-value}) > 1$ . Color dots show metabolite transporters of the indicated family. N=4 biological replicates. **f**, Intracellular levels of itaconate, GSH and GSSG detected by LC-MS analysis of BMDMs treated with EC or KEC for 18h. N=7 biological replicates. Data are expressed as fold change compared to resting cells (ctrl). \* $p < 0.05$ , \*\*\* $p < 0.001$ . **g**, Metabolite set enrichment analysis (MSEA) of the most altered metabolic pathways in KEC-treated BMDMs versus Live EC-treated BMDMs after 18h of incubation. **h**, Heat map showing relative abundance (normalized peak ion intensity) of the most altered metabolites in BMDMs treated with KEC or Live EC for 18h. N=7 biological replicates.

**b**

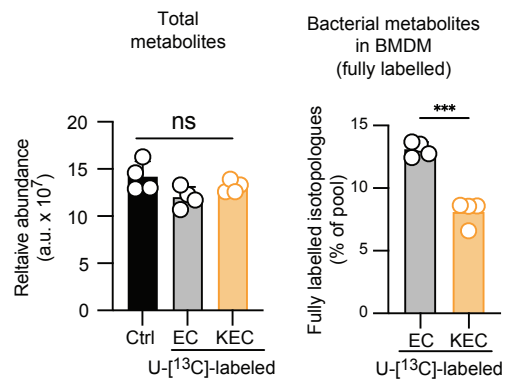

**b**

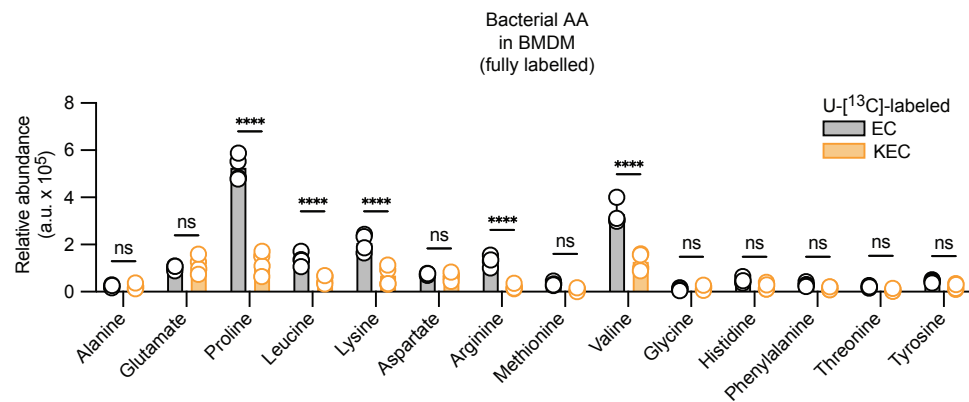

C

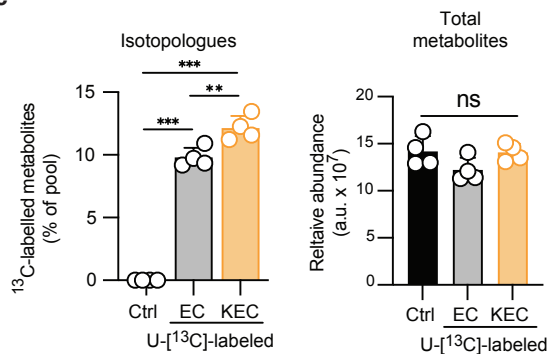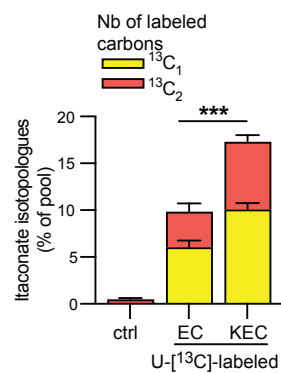

**Extended Data Fig. 6: Sensing of live and dead *E. coli* differentially modulates nutrient recycling upon phagocytosis**

**a**, Fractional levels of a pool of 45 *E. coli* fully labeled-metabolites detected by UHPLC-MS in BMDMs, 6h after phagocytosis of live U- $^{13}\text{C}$ EC (EC) or killed U- $^{13}\text{C}$ EC (KEC). Data are expressed as percentage of total pool. \*\*\* $p < 0.001$ . ns, not significant. **b**, Intracellular levels of *E. coli* fully labeled-amino acids detected by UHPLC-MS in BMDMs, 6h after phagocytosis of live U- $^{13}\text{C}$ EC (EC) or killed U- $^{13}\text{C}$ EC (KEC). Data are expressed as relative abundance (maximum peak area). \* $p < 0.05$ , \*\*\* $p < 0.001$ . ns, not significant. **c**, Fractional labelling of itaconate in BMDMs cultured in direct contact (well) or separated (insert, trans-well) from fully-labelled U- $^{13}\text{C}$ Killed EC for 6h or 18h. Fraction of isotopologues was determined by LC-MS. N=4 biological replicates. **d,e**, Intracellular levels of isotopologues (**d**) and total metabolites detected (**e**) by UHPLC-MS over 45 selected metabolites in BMDMs, 18h after phagocytosis live U- $^{13}\text{C}$ EC (EC) or killed U- $^{13}\text{C}$ EC (KEC). Data are expressed as percentage of total pool (**d**) and relative abundance (maximum peak area) (**e**). \* $p < 0.05$ , \*\*\* $p < 0.001$ . ns, not significant.

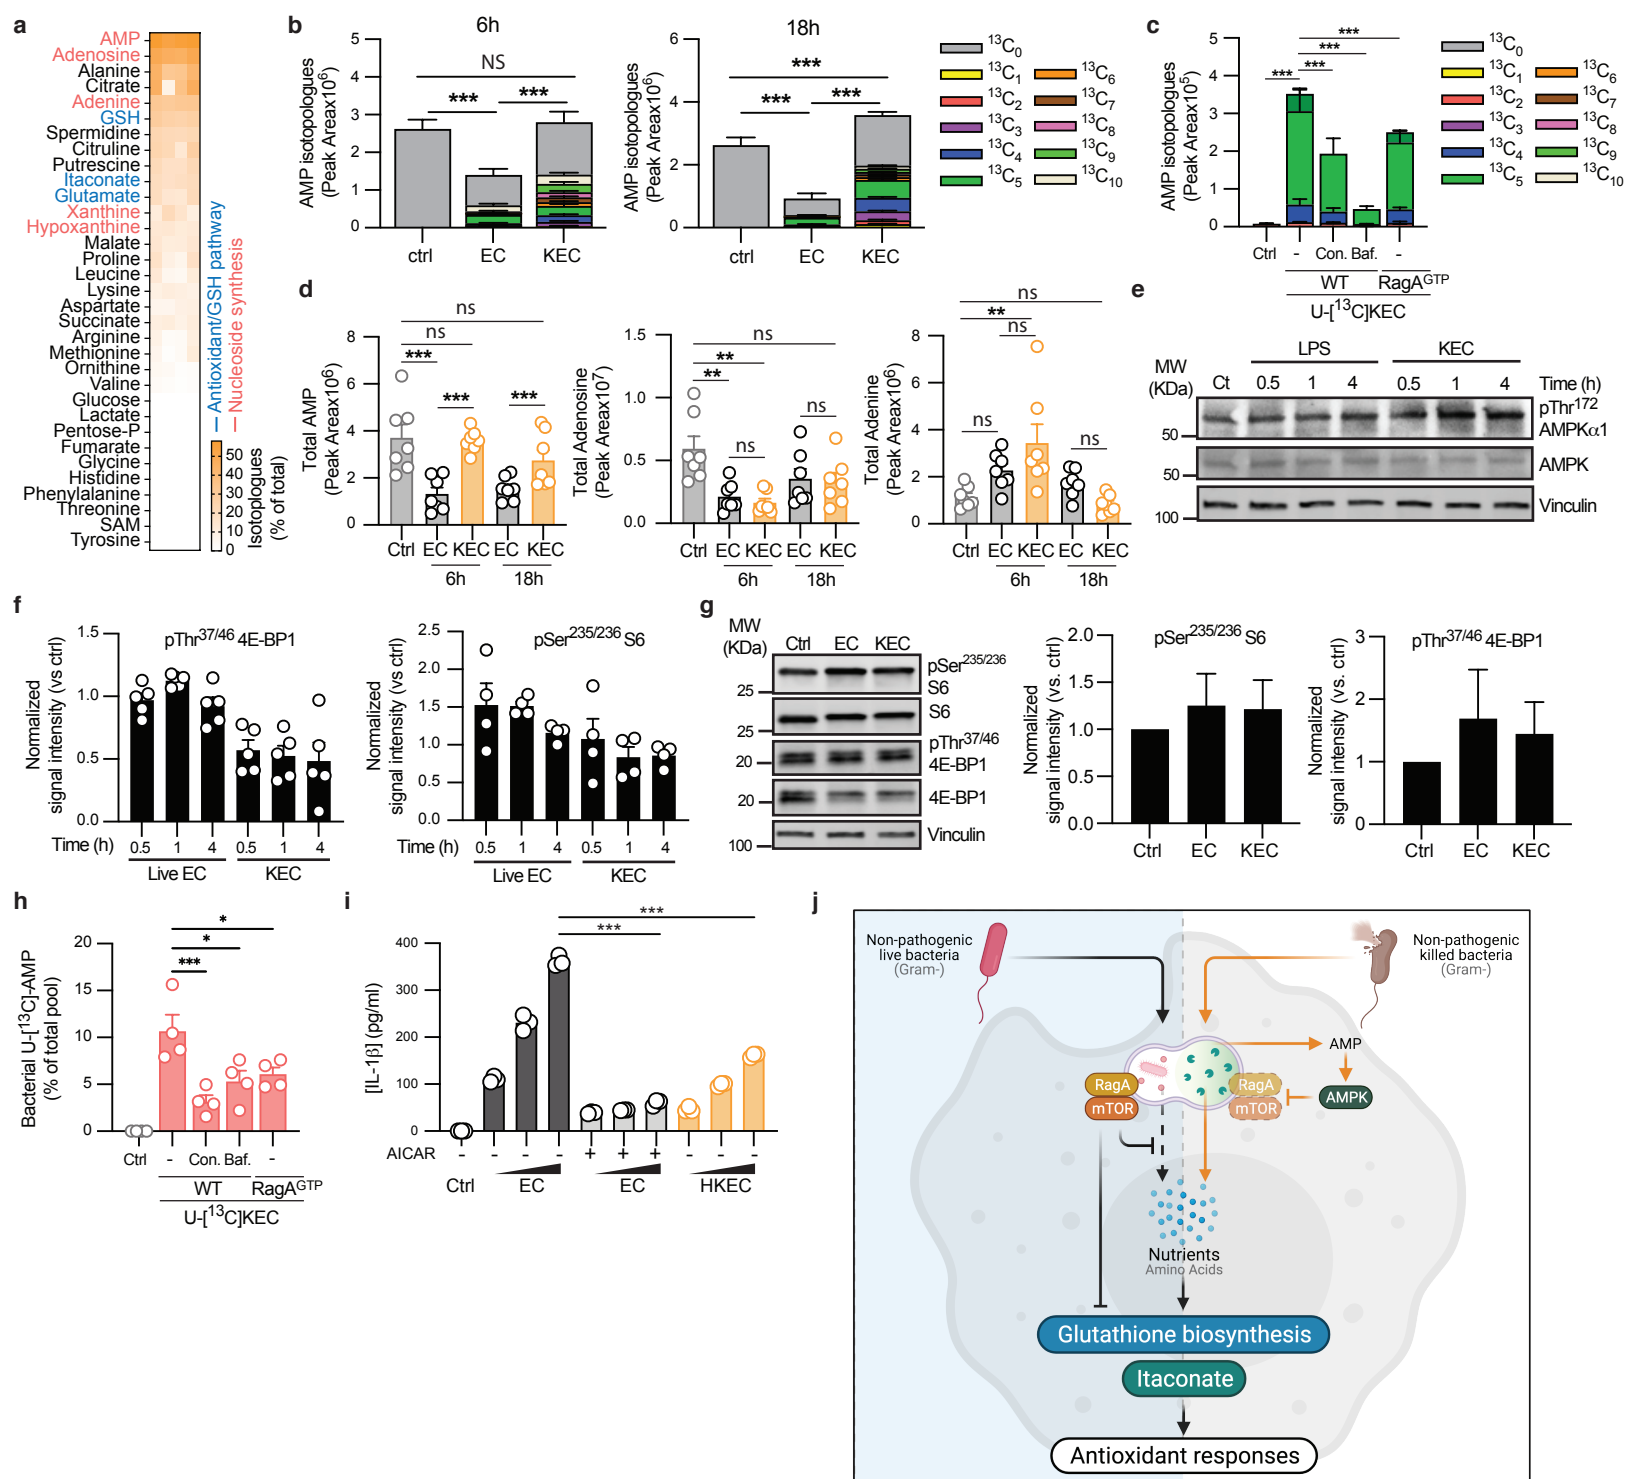

**Extended Data Fig. 7: Phagocytosis of killed *E. coli* specifically sustains intracellular AMP pool and activates AMPK in macrophages**

**a**, Heat map of isotopologues levels among various metabolites in BMDMs treated with U- $^{13}\text{C}$ KEC for 18h. N=4 biological replicates. **b**, Intracellular AMP isotopologue levels in BMDMs treated with v-ATPase inhibitors concanamycin A (Con.) or bafilomycin (Baf.) and stimulated with U- $^{13}\text{C}$ killed EC for 6h. N=4 biological replicates. Data are mean  $\pm$  s.e.m. \*\*\* $p < 0.001$ ; ns, not significant. **c**, Intracellular AMP isotopologues in BMDMs stimulated with live EC of KEC for 6h or 18h. N=7 biological replicates. Data are mean  $\pm$  s.e.m. \*\*\* $p < 0.001$ . **d**, Intracellular AMP, adenosine and adenine levels in BMDMs treated with live EC of KEC for 6h or 18h. N=7 biological replicates. Data are mean  $\pm$  s.e.m. \*\* $p < 0.01$ , \*\*\* $p < 0.001$ ; ns, not significant. **e**, Representative immunoblots of BMDMs stimulated with LPS or KEC for the indicated time. Vinculin is used as a loading control. **f**, Normalized signal ratio to vinculin from immunoblots shown in (e). Each dot represents a separate experiment. Untreated BMDMs were used as control (Ctrl). Data are mean  $\pm$  s.e.m. **g**, Representative immunoblots of BMDMs stimulated with live EC or KEC for 18h. Vinculin is used as a loading control. Normalized signal ratio to vinculin from immunoblots (right). Untreated BMDMs were used as control (Ctrl). Data are mean  $\pm$  s.e.m. **h**, Intracellular abundance of bacterial AMP in WT or *RagA*<sup>GTP</sup> BMDMs treated or not with v-ATPase inhibitors concanamycin a (Con.) or bafilomycin (Baf.) and stimulated with U- $^{13}\text{C}$ killed EC for 6h. Data are mean  $\pm$  s.e.m. of percentages of total pool. \* $p < 0.05$ , \*\*\* $p < 0.001$ . **i**, Cytokine levels supernatants of BMDMs treated or not with 5-aminoimidazole-4-carboxamide ribonucleotide (AICAR) and stimulated for 18h with live EC or KEC. Data are mean  $\pm$  SD. Representative of at least 4 experiments. \*\*\* $p < 0.001$ . **j**, Schematic representation of the metabolic recycling of internalized live and dead bacteria and the signaling pathways mobilized in macrophages.

**Supplementary Table 1: List of metabolites analyzed by UHPLC-MS and their associated metabolic pathways.**

| Compound                          | CmpdID | Pathway                      |
|-----------------------------------|--------|------------------------------|
| Alanine                           | C00041 | Amino acids                  |
| Arginine                          | C00062 | Amino acids                  |
| Asparagine                        | C00152 | Amino acids                  |
| Aspartate                         | C00049 | Amino acids                  |
| Cysteine                          | C00097 | Amino acids                  |
| Glutamate                         | C00025 | Amino acids                  |
| Glutamine                         | C00064 | Amino acids                  |
| Glycine                           | C00037 | Amino acids                  |
| Histidine                         | C00135 | Amino acids                  |
| Leucine                           | C00123 | Amino acids                  |
| Lysine                            | C00047 | Amino acids                  |
| Methionine                        | C00073 | Amino acids                  |
| Phenylalanine                     | C00079 | Amino acids                  |
| Proline                           | C00148 | Amino acids                  |
| Serine                            | C00065 | Amino acids                  |
| Threonine                         | C00188 | Amino acids                  |
| Tryptophan                        | C00078 | Amino acids                  |
| Tyrosine                          | C00082 | Amino acids                  |
| Valine                            | C00183 | Amino acids                  |
| AMP                               | C00020 | Nucleotides                  |
| dAMP                              | C00360 | Nucleotides                  |
| Adenosine                         | C00212 | Nucleotides                  |
| Adenine                           | C00147 | Nucleotides                  |
| GMP                               | C00144 | Nucleotides                  |
| CMP                               | C00055 | Nucleotides                  |
| Cytidine                          | C00475 | Nucleotides                  |
| UMP                               | C00105 | Nucleotides                  |
| IMP                               | C00130 | Nucleotides                  |
| Inosine                           | C00294 | Nucleotides                  |
| Hypoxanthine                      | C00262 | Nucleotides                  |
| Xanthine                          | C00385 | Nucleotides                  |
| Allantoate                        | C00499 | Nucleotides                  |
| 5-Hydroxyisourate                 | C11821 | Nucleotides                  |
| 5-6-Dihydrothymine                | C00906 | Nucleotides                  |
| 4-Pyridoxate                      | C00847 | Nucleotides                  |
| Nicotinamide                      | C00153 | Nucleotides                  |
| UDP-glucose                       | C00029 | Nucleotides                  |
| ADP-D-ribose                      | C01882 | Nucleotides                  |
| NAD+                              | C00003 | Nucleotides                  |
| Phosphate                         | C00009 | Phosphates                   |
| Diphosphate                       | C00013 | Phosphates                   |
| D-Glucose                         | C00031 | Glycolysis                   |
| Hexose phosphate                  | C02965 | Glycolysis                   |
| 2/3-Phospho-D-glycerate           | C00631 | Glycolysis                   |
| Pyruvate                          | C00022 | Glycolysis                   |
| Lactate                           | C01432 | Glycolysis                   |
| Maltose                           | C00208 | Other sugars                 |
| Mannitol                          | C00392 | Other sugars                 |
| D-Arabitol                        | C01904 | Other sugars                 |
| Citrate                           | C00158 | TCA cycle                    |
| 2-Oxoglutarate                    | C00026 | TCA cycle                    |
| 2-Oxoglutaramate                  | C00940 | TCA cycle                    |
| Succinate                         | C00042 | TCA cycle                    |
| Fumarate                          | C00122 | TCA cycle                    |
| Malate                            | C00149 | TCA cycle                    |
| 2-Hydroxyglutarate/Citramalate    | C02630 | Alternative Carboxylic acids |
| Itaconate                         |        | Alternative Carboxylic acids |
| D-Glucono-1-5-lactone 6-phosphate | C01236 | Pentose Phosphate Pathway    |
| Sedoheptulose 1-phosphate         | C06222 | Pentose Phosphate Pathway    |
| alpha-D-Ribose 1-phosphate        | C00620 | Pentose Phosphate Pathway    |
| Glutathione                       | C00051 | GSH homeostasis              |

|                                        |        |                                               |
|----------------------------------------|--------|-----------------------------------------------|
| Glutathione disulfide                  | C00127 | GSH homeostasis                               |
| 5-Oxoproline                           | C01879 | GSH homeostasis                               |
| S-Glutathionyl-L-cysteine              | C05526 | GSH homeostasis                               |
| Cys-Gly                                | C01419 | GSH homeostasis                               |
| Ascorbate                              | C00072 | GSH homeostasis                               |
| Dehydroascorbate                       | C05422 | GSH homeostasis                               |
| gamma-L-Glutamyl-L-cysteine            | C00669 | Gamma-glutamyls                               |
| gamma-Glutamyl-Se-methylselenocysteine | C05695 | Gamma-glutamyls                               |
| gamma-L-Glutamyl-D-alanine             | C03738 | Gamma-glutamyls                               |
| gamma-Glutamyl-gamma-aminobutyrate     | C15767 | Gamma-glutamyls                               |
| gamma-L-Glutamylputrescine             | C15699 | Gamma-glutamyls                               |
| (5-L-Glutamyl)-L-glutamine             | C05283 | Gamma-glutamyls                               |
| L-Homocysteine                         | C00155 | Serine biosynthesis and one-carbon metabolism |
| Dimethylglycine                        | C01026 | Serine biosynthesis and one-carbon metabolism |
| 3-Phosphonooxypyruvate                 | C03232 | Serine biosynthesis and one-carbon metabolism |
| S-Adenosyl-L-methionine                | C00019 | Serine biosynthesis and one-carbon metabolism |
| Ornithine                              | C01602 | Urea cycle                                    |
| L-Citrulline                           | C00327 | Urea cycle                                    |
| Argininosuccinate                      | C03406 | Urea cycle                                    |
| Cadaverine                             | C01672 | Polyamines                                    |
| Putrescine                             | C00134 | Polyamines                                    |
| Spermidine                             | C00315 | Polyamines                                    |
| Spermine                               | C00750 | Polyamines                                    |
| N-Acetylneuramate                      | C00270 | Aminosugars                                   |
| N-Glycoloyl-neuramate                  | C03410 | Aminosugars                                   |
| alpha-D-Glucosamine 1-phosphate        | C06156 | Aminosugars                                   |
| 1-4-beta-D-Xylan                       | C02352 | Aminosugars                                   |
| UDP-N-acetyl-D-glucosamine             | C00043 | Aminosugars                                   |
| Creatine                               | C00300 | Arginine and proline metabolism               |
| Creatinine                             | C00791 | Arginine and proline metabolism               |
| 4-Acetamidobutanoate                   | C02946 | Arginine and proline metabolism               |
| N-Acetyl-L-citrulline                  | C15532 | Arginine and proline metabolism               |
| N-Acetylornithine                      | C00437 | Arginine and proline metabolism               |
| Guanidinoacetate                       | C00581 | Arginine and proline metabolism               |
| trans-4-Hydroxy-L-proline              | C01157 | Arginine and proline metabolism               |
| 5-Aminopentanoate                      | C00431 | Arginine and proline metabolism               |
| Taurine                                | C00245 | Sulfur metabolism                             |
| Hypotaurine                            | C00519 | Sulfur metabolism                             |
| 3-Sulfinol-L-alanine                   | C00606 | Sulfur metabolism                             |
| L-Cysteate                             | C00506 | Sulfur metabolism                             |
| L-Methionine S-oxide                   | C02989 | Sulfur metabolism                             |
| Indole-3-acetate                       | C00954 | Indole and Tryptophan                         |
| Indolepyruvate                         | C00331 | Indole and Tryptophan                         |
| kynurenine                             | C00328 | Indole and Tryptophan                         |
| N-formyl kynurenine                    | C02700 | Indole and Tryptophan                         |
| Anthranilate                           | C00108 | Indole and Tryptophan                         |
| Picolinic acid                         | C10164 | Indole and Tryptophan                         |
| g-Oxalo-crotonate                      | C03453 | Indole and Tryptophan                         |



|                                                           |           |                                     |
|-----------------------------------------------------------|-----------|-------------------------------------|
| Glycerol 3-phosphate                                      | C00093    | Glycerophospholipid biosynthesis    |
| Ethanolamine phosphate                                    | C00346    | Glycerophospholipid biosynthesis    |
| sn-glycero-3-Phosphoethanolamine                          | C01233    | Glycerophospholipid biosynthesis    |
| Acetylcholine                                             | C01996    | Glycerophospholipid biosynthesis    |
| acetyl-carnitine                                          | C02571    | Carnitine and fatty acid metabolism |
| propionyl-carnitine                                       | C03017    | Carnitine and fatty acid metabolism |
| butanoyl-L-carnitine                                      | C02862    | Carnitine and fatty acid metabolism |
| O-dodecenoyl-carnitine                                    | HMDB13326 | Carnitine and fatty acid metabolism |
| Hexanoic acid (caproate)                                  | C01585    | Saturated Fatty acids               |
| Heptanoic acid                                            | C17714    | Saturated Fatty acids               |
| Octanoic acid (caprylate)                                 | C06423    | Saturated Fatty acids               |
| Nonanoic acid (pelargonate)                               | C01601    | Saturated Fatty acids               |
| Dodecanoic acid                                           | C02679    | Saturated Fatty acids               |
| Tetradecanoic acid                                        | C06424    | Saturated Fatty acids               |
| Hexadecanoic acid                                         | C00249    | Saturated Fatty acids               |
| Octadecanoic acid (stearic acid)                          | C01530    | Saturated Fatty acids               |
| Tetradecenoic acid                                        | C08322    | Monounsaturated Fatty Acids         |
| Hexadecenoic acid                                         | C08362    | Monounsaturated Fatty Acids         |
| Octadecenoic acid (oleic acid)                            | C00712    | Monounsaturated Fatty Acids         |
| Linoleate                                                 | C01595    | Poly-unsaturated Fatty Acids        |
| Octadecatrienoic acid (linolenic acid)                    | C06427    | Poly-unsaturated Fatty Acids        |
| Eicosatetraenoic acid                                     | C00219    | Poly-unsaturated Fatty Acids        |
| Eicosapentaenoic acid                                     | C06428    | Poly-unsaturated Fatty Acids        |
| Docosahexaenoic acid                                      | C06429    | Poly-unsaturated Fatty Acids        |
| (8Z-11Z-14Z)-Icosatrienoic acid                           | C03242    | Essential fatty acids               |
| (5Z-8Z-11Z-14Z-17Z)-Icosapentaenoic acid                  | C06428    | Essential fatty acids               |
| (7Z-10Z-13Z-16Z-19Z)-Docosa-7-10-13-16-19-pentaenoic acid | C16513    | Essential fatty acids               |
